# Supplementary material for: Diffusion is capable of translating anisotropic apoptosis initiation into a homogeneous execution of cell death
Source: Springer Nature journal article supplement (doi:10.1186/1752-0509-4-9), 2010-02-04
Supplement: Additional file 4 [file 1752-0509-4-9-s4.pdf]

#### Additional File 4

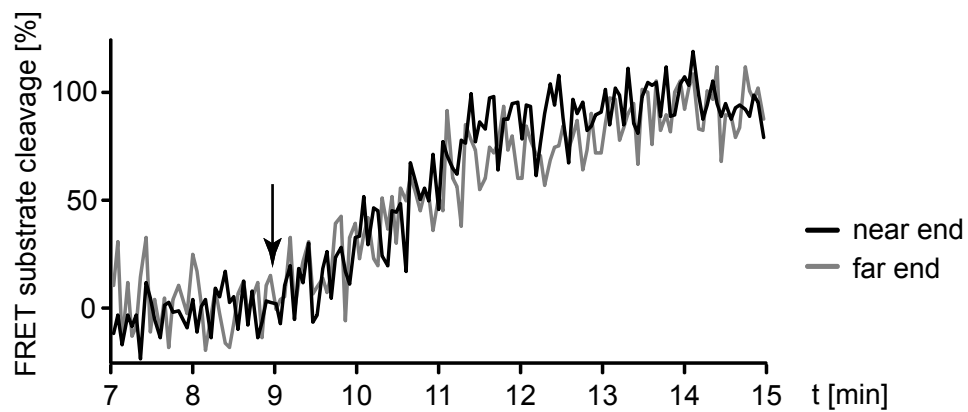

Figure Legend Additional File 4: Spatially homogeneous caspase activation in HeLa cervical cancer cells.

Substrate cleavage by effector caspases was experimentally measured by CFP-DEVD-YFP FRET disruption at fast sampling rates in HeLa cells. FRET disruption was measured in regions at distal ends of the cell. The traces shown were obtained from a cell treated with 100 ng/ml TRAIL/1  $\mu$ g/ml CHX. Arrow indicates onset of substrate cleavage. Corresponding results were obtained from n = 19 additional cells treated with TRAIL/CHX and n = 14 cells treated with 1  $\mu$ M STS.
